# Supplementary material
Source: MDPI journal article supplement (https://www.mdpi.com/2073-4344/12/11/1343)
Supplement: s1 [file s1]

# Supporting information

## Spark Ablation for the Fabrication of PEM Water Electrolysis Catalyst-Coated Membranes

Foteini M. Sapountzi <sup>1,\*</sup>, Marek Lavorenti <sup>2,3</sup>, Wilbert Vrijburg <sup>4</sup>, Sofia Dimitriadou <sup>4</sup>, Beata Tyburska-Pueschel <sup>2</sup>, Peter Thüne <sup>5</sup>, Hans Niemantsverdriet <sup>1</sup>, Tobias V. Pfeiffer <sup>4</sup> and Mihalis N. Tsampas <sup>2,\*</sup>

<sup>1</sup> Syngaschem BV, Syncat@DIFFER, 5600 HH Eindhoven, The Netherlands

<sup>2</sup> Dutch Institute For Fundamental Energy Research (DIFFER), 5612 AJ Eindhoven, The Netherlands

<sup>3</sup> Department of Chemical Engineering and Chemistry, Eindhoven University of Technology, 5600 MB Eindhoven, The Netherlands

<sup>4</sup> VSPARTICLE BV, 2612 HL Delft, The Netherlands

<sup>5</sup> Fontys University of Applied Sciences, 5612 AP Eindhoven, The Netherlands

\* Correspondence: foteini@syngaschem.com (F.M.S.); m.tsampas@diffier.nl (M.N.T.)

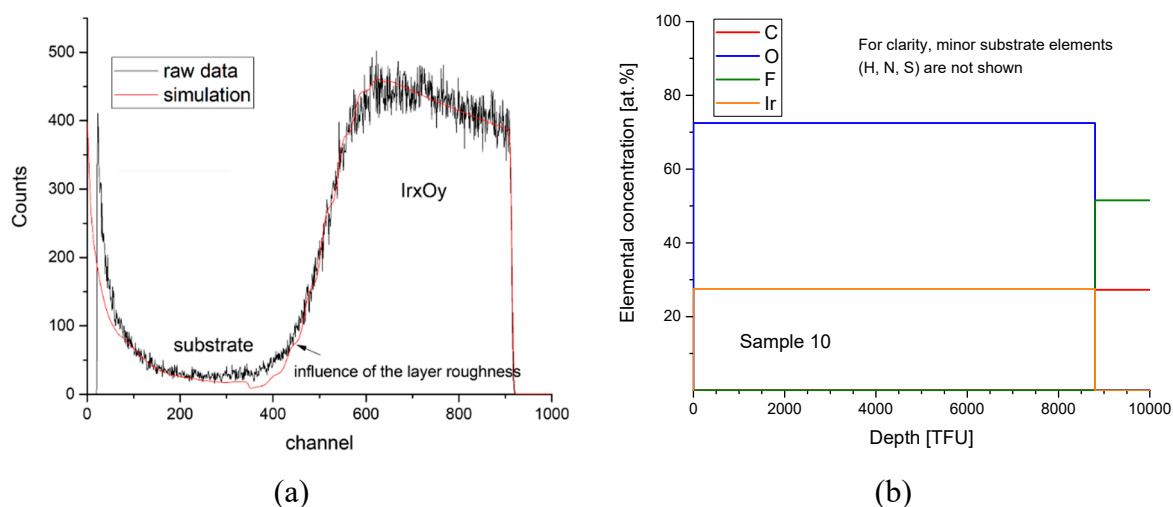

**Figure S1.** (a) RBS raw data (black line) and simulation data (red line) for anode-coated spark ablation CCM. The estimated actual Ir loading of  $0.77 \text{ mg cm}^{-2} \pm 3.5 \%$  is in excellent agreement with the nominal (predicted) loading of  $0.8 \text{ mg cm}^{-2}$ . (b) Elemental concentration in at% for C, O, F, Ir (C and F are attributed to the Nafion membrane, Ir and O to the catalyst layer) versus the film thickness in thin film units (tfu). The IrO<sub>x</sub> film has a thickness of 8800 tfu.

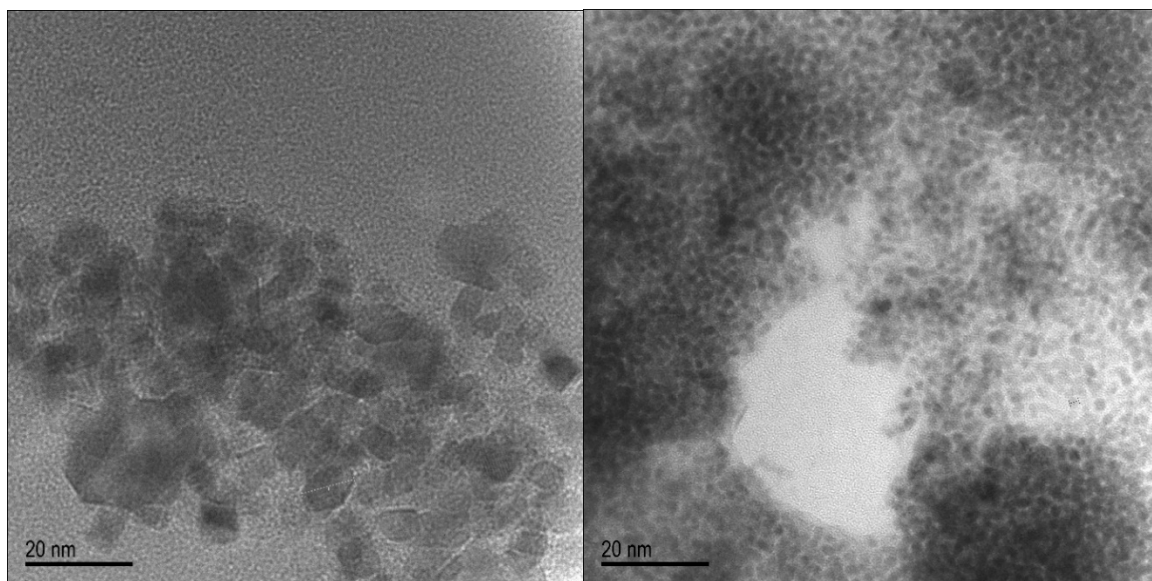

**Figure S2.** TEM images at 400 k magnification of IrO<sub>x</sub> coated Nafion CCMs. Left: commercial CCM; typical grains with diameter of 10 nm are observed. Right: spark ablation CCM; typical grains with 2 nm diameter are observed.

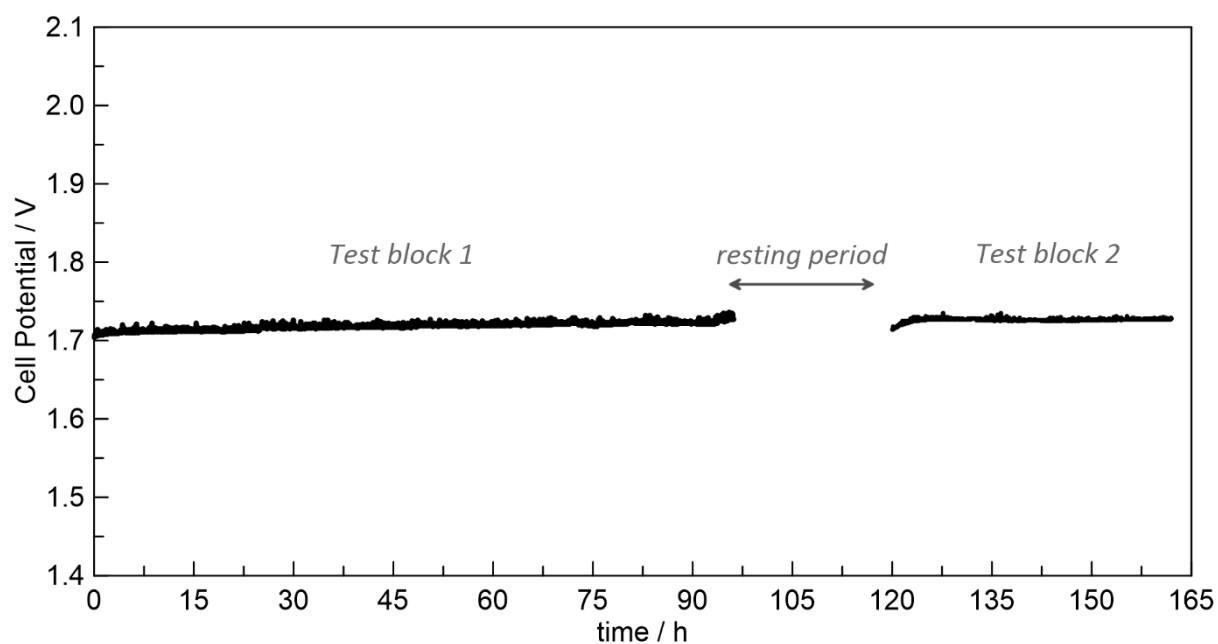

**Figure S3.** Time evolution of cell potential during two test blocks of constant load (CL) operation at 200 mA cm<sup>-2</sup> at 60 °C with a commercial (benchmark) CCM. 2 mg cm<sup>-2</sup> IrRuO<sub>x</sub> coated Nafion 115 interfaced to a Pt/C-cloth (4 mg cm<sup>-2</sup>).

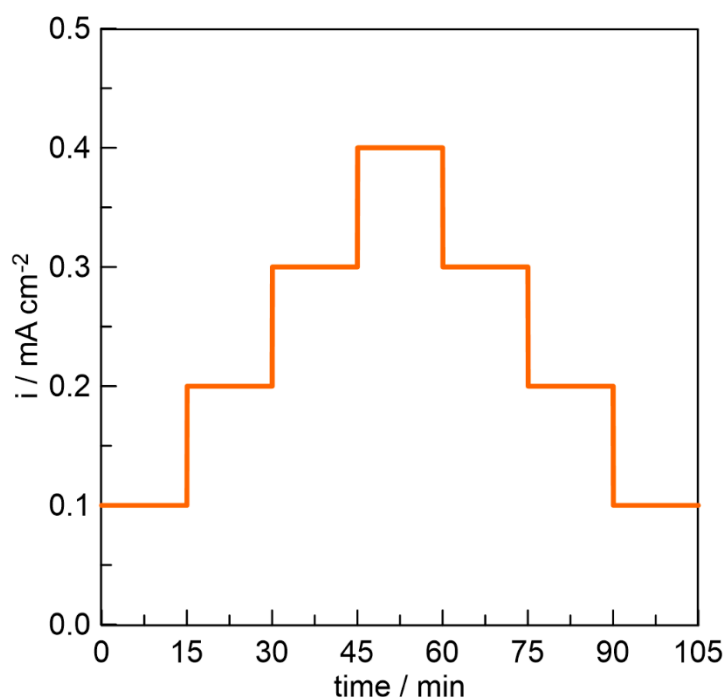

**Figure S4.** The testing block followed during accelerated stress test (AST). The AST profile consists of successively performing this testing block for 85 times.

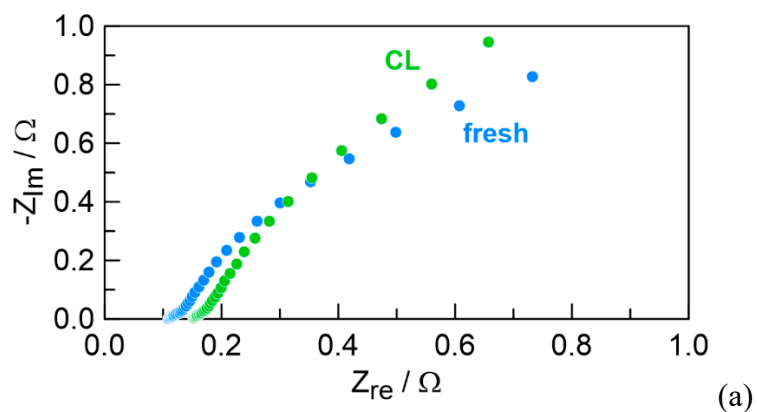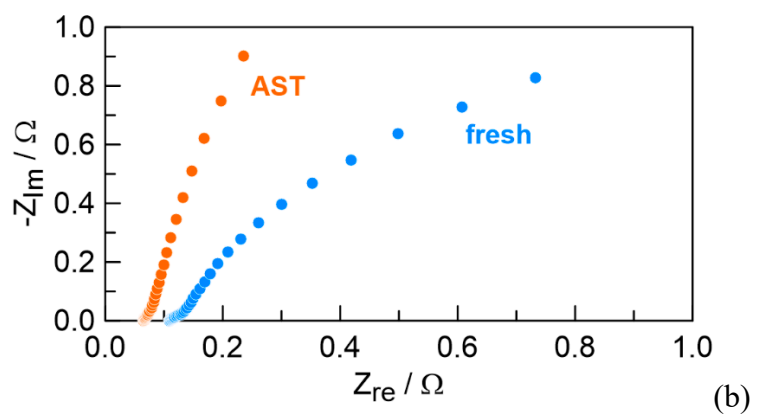

**Figure S5.** Nyquist spectra before and after (a) the CL (constant load) durability profile, (b) the AST (accelerated stress test) durability profile. IrO<sub>x</sub>-coated spark ablation CCM (0.8 mg cm<sup>-2</sup>), Nafion 115, 4 mg cm<sup>-2</sup> Pt on C-cloth cathode.

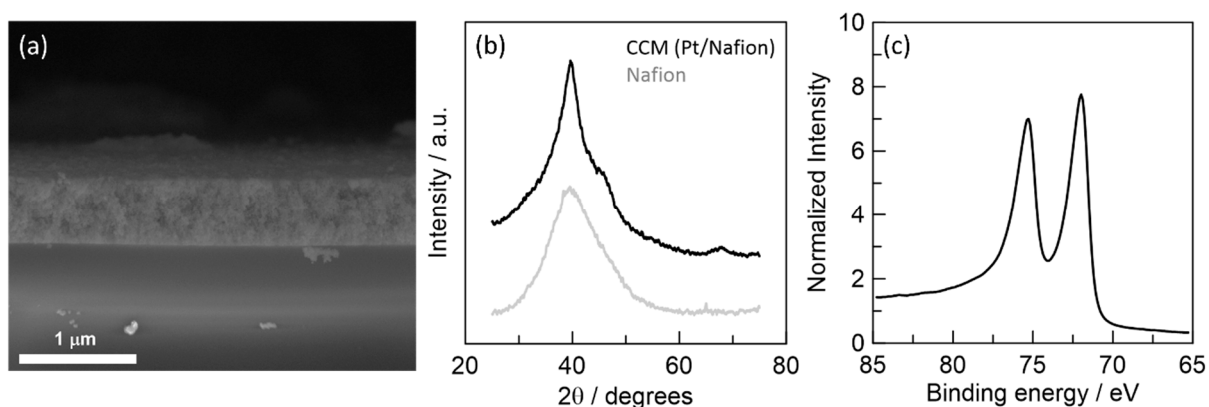

**Figure S6.** Physicochemical characterization of the Pt film which served as cathode for the spark ablation full CCM study. (a) Cryo-fractured SEM cross-section showing the uniformity and thickness of the Pt layer, (b) XRD pattern of Pt/Nafion side, (c) XPS Pt 4f spectrum.

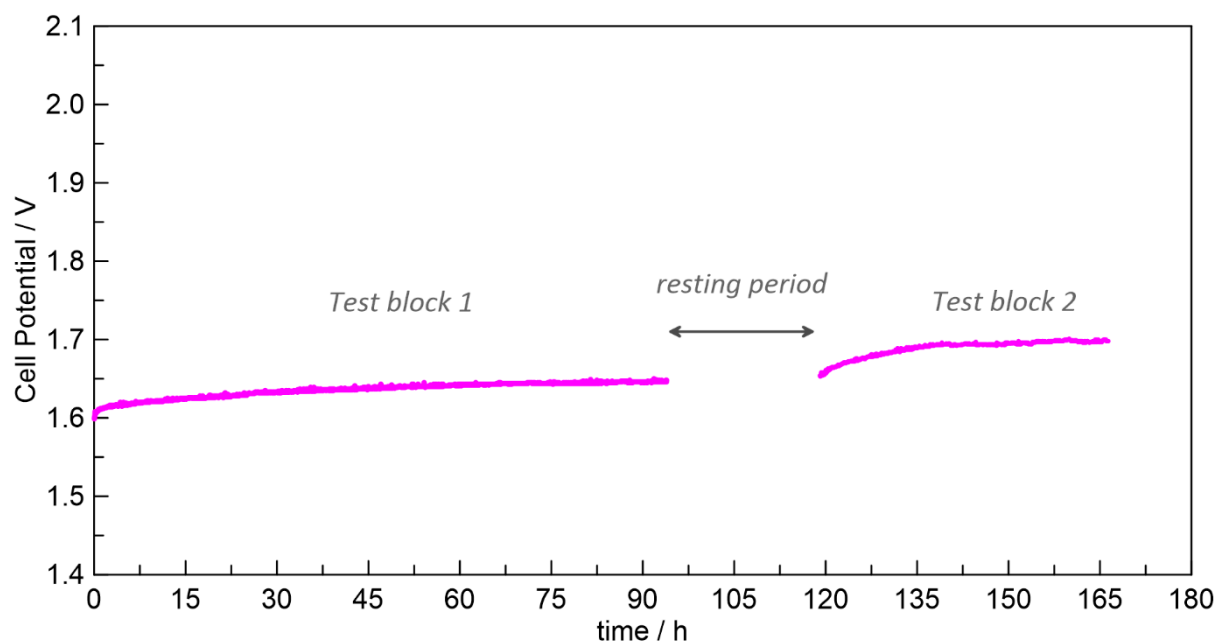

**Figure S7.** Time evolution of cell potential during two test blocks of constant load (CL) operation at  $200 \text{ mA cm}^{-2}$  at  $60^\circ \text{C}$  with a spark ablation fully coated CCM ( $0.8 \text{ mg cm}^{-2} \text{ IrO}_x$ ,  $0.5 \text{ mg cm}^{-2} \text{ Pt}$ , Nafion 115).

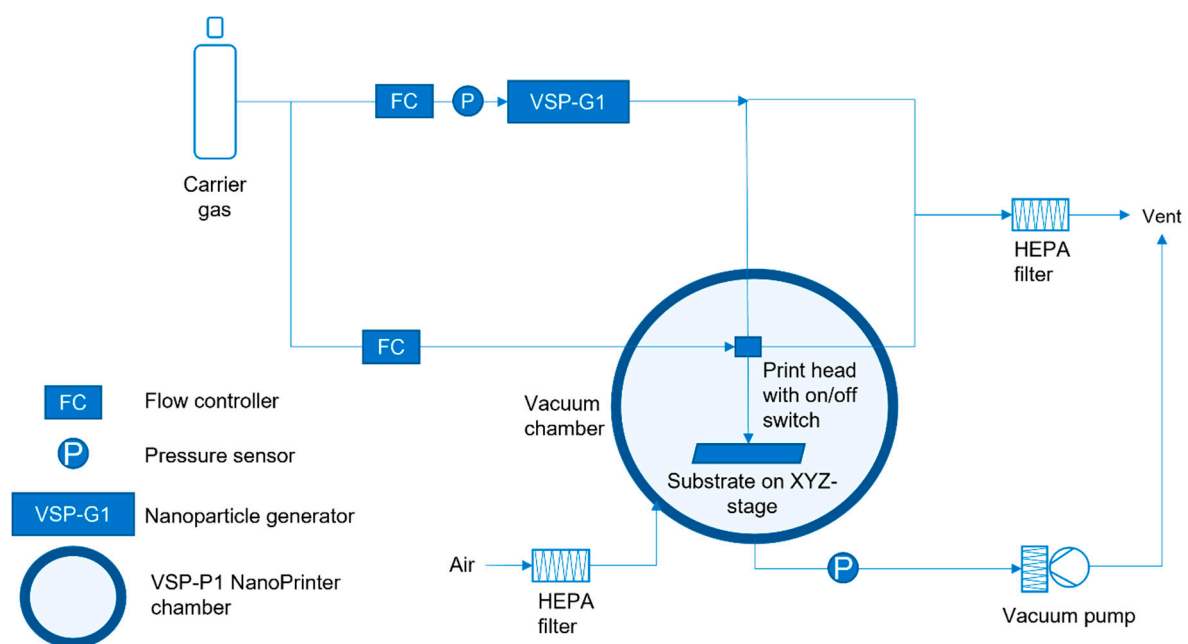

**Figure S8.** Process flow of nanoparticle generation via spark ablation and printing via impaction.
